# Supplementary material
Source: PubMed Central journal article supplement (PMC3589188)
Supplement: supp_WNL.0b013e31827b9121_Randomized_trial_of_Monocycline.pdf [file supp_WNL.0b013e31827b9121_Randomized_trial_of_Monocycline.pdf]

## Randomized trial of minocycline in the treatment of HIV-associated cognitive impairment

دراسة تجريبية عشوائية حول استخدام المينوسكلين في علاج القصور الإدراكي المرتبط بفيروس نقص المناعة البشرية

**الهدف:** لتقييم فعالية وسلامة المينوسكلين في علاج القصور الإدراكي المرتبط بفيروس نقص المناعة البشرية.

**طريقة البحث:** قمنا بإشراك مرضى مصابين بفيروس نقص المناعة ممن تراوح تعداد ال CD4 لديهم من 250 حتى 500 خلية / ميكرو لتر في دراسة عشوائية، مزدوجة التعمية مقارنة بعقار وهمي غلف placebo. تلقى المشاركون في الدراسة 100 ملغ من المينوسكلين أو عقار وهمي مطابق فمويًا كل 12 ساعة لمدة 24 أسبوعًا. وتم قياس الوظائف المعرفية باستخدام اختبار أوغندا العصبي-النفسي (U NP SUM) ومقياس ميموريال سلون كيترينج (MSK). وكان مقياس الفاعلية الأولي هو تغيير بمقدار 9 وحدات قياسية على U NP Sum z scores وسطيا خلال 24 اسبوع.

**النتائج:** التحق بالدراسة ثلاثة وسبعون مشاركا. 90% من الإناث، 49% تتراوح أعمارهم بين 30 و 39 عاما، و 74% حاصلين على 6 سنوات أو أكثر من التعليم. حصل أحد المشاركين على MSK من المرحلة 1 (أي خرف فيروس نقص المناعة البشرية خفيف)، و 72 مشاركا كان لديهم MSK مرحلة 0.5 (أي خرف تحت سريري) في التقييم الأولي. كان تأثير المينوسكلين على تغيير ال U NP Sum خلال 24 أسبوع مقارنة مع العقار الوهمي 0.03 (مجال الثقة 95%- 0.51، 0.46، 0.37 = P).

**الاستنتاجات:** كان استعمال المينوسكلين جيد التحمل وآمن في الأفراد المصابين بفيروس نقص المناعة البشرية. ومع ذلك، فإنه لم يحسن القصور الإدراكي المرتبط بفيروس نقص المناعة البشرية.

**تصنيف الدليل:** هذه الدراسة تقدم دليلا من الدرجة الثانية أن 100 ملغ من المينوسكلين معطاة عن طريق الفم كل 12 ساعة لمدة 24 أسابيع لم يكن له تأثير ذو معنى مقارنة مع العقار الوهمي في تحسين الوظيفة الإدراكية في المرضى ايجابيين فيروس نقص المناعة البشرية الذين لم يتلقوا بعد العلاج بمضادات الفيروسات عكسية النسخ.

**OBJECTIVE:** To evaluate the efficacy and safety of minocycline in the management of HIV-associated cognitive impairment.

**METHODS:** We enrolled HIV-positive participants with a CD4 count of 250 to 500 cells/ $\mu$ L in a randomized, double-blind, placebo-controlled study. They received 100 mg of minocycline or matching placebo orally every 12 hours for 24 weeks. Cognitive function was measured using the Uganda Neuropsychological Test Battery Summary Measure (U NP Sum) and the Memorial Sloan-Kettering (MSK) scale. The primary efficacy measure was the 24-week change in an average of 9 standardized U NP Sum z scores.

**RESULTS:** Seventy-three participants were enrolled. Of these, 90% were female, 49% were between the ages 30 and 39 years, and 74% had 6 or more years of education. One participant had MSK score of stage 1 (i.e., mild HIV dementia), and 72 participants had MSK stage 0.5 (i.e., equivocal or subclinical dementia) at the baseline evaluation. The minocycline effect on the 24-week change of the U NP Sum compared with placebo was 0.03 (95% confidence interval -0.51, 0.46;  $p = 0.37$ ).

**CONCLUSION:** Minocycline was safe and well tolerated in HIV-positive individuals. However, it did not improve HIV-associated cognitive impairment.

**CLASSIFICATION OF EVIDENCE:** This study provides Class II evidence that 100 mg of minocycline given orally every 12 hours for 24 weeks had no significant effect compared with placebo in the improvement of cognitive function in antiretroviral therapy-naive, HIV-positive patients.

---

**Translator: Amir Shaban MD, Department of Neurology, Tulane University, New Orleans, LA**  
**Translation Reviewer: Owais K. Alsrouji, Senior Year Medical Student, Jordan University of Science and Technology, Irbid, Jordan**
